# Supplementary material for: Optimal time interval between hysteroscopic polypectomy and frozen-thawed blastocyst transfer: A retrospective study
Source: PLoS One. 2020 Oct 20;15(10):e0240882. doi: 10.1371/journal.pone.0240882 (PMC7575078; doi:10.1371/journal.pone.0240882)
Supplement: S1 File — The excel file is our original data of all 204 patients, including their basic characteristics, endometrial, oocyte, and embryo conditions, and pregnancy outcomes. (XLS) [file pone.0240882.s001.xls]

## Sheet: 工作表1
Group 1	case NO	Age of oocyte	Infertility factor	No. of polyp	Protocol	interval	BH	BW	BMI	trigger day E2	oocyte no.	Gravida	Para	Em thickness	Embryo No.	No. of Good embryo	positive Bhcg	clinical preg	IUGS	No of Live birth	multiple LB	Live birth or not	Abortion	Group 120
1	1	28	Male	2	E+P	67	163	52	19.5717	2871	13	1	1	7	2	2	1	1	1	1	0	1	0	1
1	2	29	Male	2	E+P	168	160	65	25.3906	1649	15	2	0	7.8	4	0	0	0	0	0	0	0	0	2
1	3	29	Ovarian	4	E+P	102	160	58	22.6562	10955	22	0	0	10.1	2	1	0	0	0	0	0	0	0	1
1	4	30	Male	4	E+P	298	161	52	20.061	5869	27	1	0	11.7	2	1	0	0	0	0	0	0	0	2
1	5	30	Tubal	3	E+P	52	158	70	28.0404	2640	20	0	0	10	2	0	1	1	1	0	0	0	1	1
1	6	30	Tubal	5	E+P	190	170	65	22.4913	2396	19	0	0	16	2	2	1	1	1	1	0	1	0	2
1	7	31	Unexplained	4	Natural	47	169	70	24.5089	747	10	0	0	13.5	2	2	0	0	0	0	0	0	0	1
1	8	31	Male	1	E+P	54	158	45	18.026	8579	41	0	0	12	2	1	1	1	1	1	0	1	0	1
1	9	32	Male	1	E+P	304	160	60	23.4375	3401	23	1	0	8.1	2	1	0	0	0	0	0	0	0	2
1	10	32	Tubal	3	E+P	110	156	47	19.313	4375	11	0	0	10	2	1	1	0	0	0	0	0	1	1
1	11	32	Male	1	E+P	127	172	64	21.6333	2404	20	1	0	8.5	2	2	1	1	2	2	1	1	0	2
1	12	32	Male	3	Natural	48	160	62	24.2188	1737	12	0	0	12.5	2	0	1	1	2	2	1	1	0	1
1	13	32	Male	4	E+P	162	158	53	21.2306	2018	12	1	0	15.5	2	2	0	0	0	0	0	0	0	2
1	14	32	Male	4	Natural	98	158	53	21.2306	2018	12	0	0	12	2	2	1	0	0	0	0	0	1	1
1	15	32	Male	1	Natural	228	164	52	19.3337	2598	16	0	0	14	2	0	0	0	0	0	0	0	0	2
1	16	33	Unexplained	1	E+P	45	163	58	21.83	1457	17	0	0	12.4	2	2	0	0	0	0	0	0	0	1
1	17	33	Endometriosis	4	E+P	49	158	45	18.026	11781	24	0	0	9.2	2	2	0	0	0	0	0	0	0	1
1	18	33	Ovarian	1	E+P	46	173	65	21.7181	982	10	1	0	12.9	2	0	1	1	1	1	0	1	0	1
1	19	33	Unexplained	2	Natural	232	158	60	24.0346	5662	22	1	0	10.8	2	1	0	0	0	0	0	0	0	2
1	20	33	Male	5	E+P	246	158	60	24.0346	10879	33	0	0	9.6	2	0	0	0	0	0	0	0	0	2
1	21	33	Tubal	1	E+P	47	164	53	19.7055	2299	17	0	0	12	2	2	1	1	1	0	0	0	1	1
1	22	33	Endometriosis	1	E+P	58	158	52	20.83	6911	8	0	0	9.1	3	1	1	1	1	1	0	1	0	1
1	23	34	tubal	1	E+P	87	160	44	17.1875	4306	31	1	1	8.7	2	1	1	1	1	1	0	1	0	1
1	24	34	Male	2	E+P	59	157	56	22.719	6726	37	0	0	10.6	3	2	1	1	2	2	1	1	0	1
1	25	34	male	1	E+P	89	172	75	25.3515	4663	19	0	0	12	2	2	1	1	2	2	1	1	0	1
1	26	34	Male	1	E+P	460	176	75	24.2123	8624	11	1	0	10.2	3	1	0	0	0	0	0	0	0	2
1	27	34	Ovarian	10	E+P	56	164	64	23.7954	1587	13	1	0	9.7	2	1	1	1	1	1	0	1	0	1
1	28	34	Male	2	E+P	67	161	55	21.2183	6883	20	0	0	11.8	2	1	1	1	1	1	0	1	0	1
1	29	34	Endometriosis	1	E+P	59	163	58	21.83	2118	14	1	0	9.1	2	0	0	0	0	0	0	0	0	1
1	30	34	Tubal	1	Natural	110	167	60	21.5139	2306	16	0	0	10.3	2	0	1	0	0	0	0	0	1	1
1	31	34	Male	3	E+P	86	162	54	20.5761	2277	15	0	0	8.3	3	2	1	1	3	2	1	1	0	1
1	32	34	Male	4	E+P	102	165	62	22.7732	1186	12	1	0	11	2	0	1	1	1	1	0	1	0	1
1	33	34	Male	1	Natural	121	164	50	18.5901	4809	43	0	0	13	2	1	1	1	1	1	0	1	0	2
1	34	34	Male	6	Natural	188	160	51	19.9219	4216	31	0	0	14	3	1	1	1	1	1	0	1	0	2
1	35	35	PCOS	8	E+P	88	164	78	29.0006	2027	14	1	0	11.2	2	1	1	1	1	0	0	0	1	1
1	36	35	PCOS	9	E+P	162	160	82	32.0312	5636	52	0	0	11.3	2	1	1	1	1	1	0	1	0	2
1	37	35	Ovarian	1	E+P	67	172	64	21.6333	1493	14	0	0	11.7	2	1	1	1	1	1	0	1	0	1
1	38	35	Male	1	Natural	76	164	61	22.68	1320	10	1	0	10.5	2	0	1	1	1	1	0	1	0	1
1	39	35	Male	2	E+P	313	159	61	24.1288	3494	12	0	0	10.1	2	0	1	1	1	1	0	1	0	2
1	40	35	Unexplained	4	E+P	40	162	60	22.8624	3508	17	3	2	13.6	2	1	1	1	1	1	0	1	0	1
1	41	35	Male	1	E+P	72	163	54	20.3244	2748	19	0	0	9.9	2	1	1	1	1	1	0	1	0	1
1	42	35	Male	3	E+P	47	159	57	22.5466	2820	25	1	0	9.4	2	1	1	1	1	1	0	1	0	1
1	43	35	Unexplained	3	Natural	92	158	50	20.0288	3262	14	0	0	12	1	0	1	1	1	1	0	1	0	1
1	44	35	Tubal	8	E+P	47	168	65	23.03	3162	19	0	0	13	2	0	1	1	1	1	0	1	0	1
1	45	35	PCOS	2	E+P	109	159	71	28.0843	3265	11	0	0	8.9	3	1	0	0	0	0	0	0	0	1
1	46	35	Unexplained	3	Natural	100	160	57	22.2656	3793	23	1	0	14	2	1	1	1	1	1	0	1	0	1
1	47	35	Male	1	E+P	73	168	64	22.6757	4836	43	0	0	10.8	2	2	1	0	0	0	0	0	1	1
1	48	35	Unexplained	5	Natural	1251	166	60	21.7738	3136	12	0	0	12	1	1	1	1	1	1	0	1	0	2
1	49	35	Unexplained	2	Natural	31	161	50	19.2894	740	14	0	0	8.9	3	2	1	1	2	1	0	1	0	1
1	50	36	Male	2	E+P	38	165	74	27.1809	2362	13	0	0	9.1	2	1	0	0	0	0	0	0	0	1
1	51	36	Tubal	2	E+P	141	160	53	20.7031	2429	12	1	0	11.2	2	0	0	0	0	0	0	0	0	2
1	52	36	male	1	E+P	196	162	58	22.1003	3670	18	0	0	8.3	2	2	0	0	0	0	0	0	0	2
1	53	36	Unexplained	2	E+P	93	158	70	28.0404	5717	25	1	0	10.3	2	1	1	1	2	1	0	1	0	1
1	54	36	PCOS	2	E+P	751	165	63	23.1405	10818	42	0	0	8.4	2	2	1	1	1	1	0	1	0	2
1	55	36	Male	6	E+P	92	154	49	20.6612	3379	20	0	0	8.8	2	2	1	1	2	2	1	1	0	1
1	56	36	Male	1	E+P	95	155	64	26.6389	4186	12	0	0	15.3	2	1	1	1	1	1	0	1	0	1
1	57	36	Male	3	E+P	38	160	57	22.2656	2051	14	0	0	9	2	1	1	1	1	1	0	1	0	1
1	58	36	Ovarian	4	E+P	71	163	63	23.7118	414	4	0	0	14.7	1	0	0	0	0	0	0	0	0	1
1	59	36	Ovarian	2	E+P	46	163	65	24.4646	5562	33	1	1	12.5	3	2	1	1	2	1	0	1	0	1
1	60	36	Male	1	E+P	53	164	51	18.9619	1557	18	0	0	9	2	2	1	0	0	0	0	0	1	1
1	61	37	male	6	E+P	51	153	70	29.903	1864	19	1	0	9.6	2	2	0	0	0	0	0	0	0	1
1	62	37	Unexplained	5	Natural	209	160	56	21.875	7005	22	0	0	9.6	2	0	0	0	0	0	0	0	0	2
1	63	37	Unexplained	2	E+P	115	160	60	23.4375	2655	19	1	0	12.8	2	1	1	1	2	1	0	1	0	1
1	64	37	Unexplained	1	E+P	294	155	44	18.3143	5395	19	1	0	11	2	2	1	1	1	1	0	1	0	2
1	65	37	Tubal	2	E+P	129	160	52	20.3125	3567	19	1	0	12	3	1	1	1	1	1	0	1	0	2
1	66	37	Unexplained	2	Natural	124	166	58	21.048	3375	31	1	0	14	3	3	1	1	3	2	1	1	0	2
1	67	38	tubal	1	Natural	46	154	49	20.6612	2659	13	0	0	12.8	2	2	1	1	1	0	0	0	1	1
1	68	38	PCOS	2	E+P	49	162	59	22.4813	5427	16	0	0	9.9	2	2	1	1	1	0	0	0	1	1
1	69	38	Male	5	E+P	46	160	62	24.2188	8488	40	0	0	10.5	2	2	1	1	1	0	0	0	1	1
1	70	38	PCOS	5	E+P	123	159	68	26.8977	1538	12	0	0	8.6	2	1	0	0	0	0	0	0	0	2
1	71	38	Age	2	E+P	54	160	59	23.0469	4498	19	0	0	14	2	1	0	0	0	0	0	0	0	1
1	72	38	Unexplained	1	Natural	67	159	57	22.5466	2466	17	2	1	8.2	2	1	1	1	1	1	0	1	0	1
1	73	38	Age	2	Natural	99	165	52	19.1001	1068	6	0	0	11	2	2	1	1	1	1	0	1	0	1
1	74	39	Ovarian	6	Natural	92	157	55	22.3133	3977	14	0	0	10.5	3	0	0	0	0	0	0	0	0	1
1	75	39	Age	1	E+P	309	156	52	21.3675	4054	19	0	0	9	2	2	1	1	2	2	1	1	0	2
1	76	39	Male	2	E+P	54	152	63	27.268	2893	11	0	0	11.4	2	1	0	0	0	0	0	0	0	1
1	77	39	Tubal	1	E+P	1097	154	59	24.8777	3711	13	1	1	12.3	2	0	0	0	0	0	0	0	0	2
1	78	39	Unexplained	1	E+P	37	165	57	20.9366	1980	9	1	0	8.6	2	2	0	0	0	0	0	0	0	1
1	79	39	Age	1	Natural	71	158	60	24.0346	2267	7	0	0	10.5	2	2	1	1	1	1	0	1	0	1
1	80	39	Age	2	Natural	109	157	60.5	24.5446	2086	14	0	0	9.6	3	0	1	1	1	0	0	0	1	1
1	81	39	Male	4	Natural	37	153	45	19.2234	4179	18	1	0	12	2	0	1	1	2	0	0	0	1	1
1	82	40	Endometriosis	2	E+P	48	153	59	25.204	2620	19	0	0	12.5	2	2	0	0	0	0	0	0	0	1
1	83	40	Ovarian	1	E+P	50	160	54	21.0938	1935	11	0	0	8	2	0	1	1	2	1	0	1	0	1
1	84	40	Male	1	E+P	76	158	56	22.4323	5293	13	0	0	8.3	2	0	0	0	0	0	0	0	0	1
1	85	40	Age	1	E+P	54	152	46	19.91	5027	21	0	0	13	2	2	1	1	2	1	0	1	0	1
1	86	41	age	3	E+P	52	161	57	21.9899	3094	12	1	0	9.8	2	1	1	1	1	0	0	0	1	1
1	87	41	Male	1	Natural	42	165	55	20.202	905	6	2	0	11.2	4	0	0	0	0	0	0	0	0	1
1	88	41	Male	6	E+P	124	164	63	23.4236	2349	13	1	1	10.8	2	0	0	0	0	0	0	0	0	2
1	89	41	Age	1	Natural	819	168	65	23.03	1501	9	2	1	12	1	0	1	1	1	1	0	1	0	2
1	90	41	Age	1	E+P	136	164	52	19.3337	4300	42	0	0	11.3	2	2	0	0	0	0	0	0	0	2
1	91	41	Endometriosis,R	1	Natural	338	156	52	21.3675	3528	30	0	0	7	1	1	0	0	0	0	0	0	0	2
1	92	42	ovarian	2	E+P	108	157	56	22.719	4551	20	0	0	9.9	2	1	1	0	0	0	0	0	1	1
1	93	42	Male	4	Natural	71	165	65	23.8751	905	8	0	0	17.6	3	1	1	1	1	1	0	1	0	1
1	94	43	ovarian	1	E+P	45	157	50	20.2848	1550	12	0	0	10	2	1	0	0	0	0	0	0	0	1
1	95	43	Endometriosis	4	Natural	67	164	57	21.1927	197	1	0	0	10	2	1	1	1	1	0	0	0	1	1
1	96	44	Ovarian	4	Natural	251	159	58	22.9421	4437	9	0	0	12.7	3	0	1	0	0	0	0	0	1	2
1	97	44	ovarian	1	Natural	70	157	52	21.0962	774	5	1	0	10.9	2	0	0	0	0	0	0	0	0	1
1	98	44	Male	5	E+P	74	158	51	20.4294	1455	7	1	0	16	4	1	1	1	1	0	0	0	1	1
1	99	44	Male, R	1	Natural	36	160	50	19.5312	1836	15	2	0	10	2	1	1	1	2	1	0	1	0	1
1	100	45	Male	1	E+P	82	162	57	21.7193	6298	16	0	0	9.2	3	0	0	0	0	0	0	0	0	1
1	101	45	Male	1	E+P	130	162	57	21.7193	6298	16	1	0	8.1	2	0	0	0	0	0	0	0	0	2
1	102	46	Male, R	6	Natural	76	163	60	22.5827	1057	14	2	1	12	1	1	1	1	1	1	0	1	0	1
2	103	28	Male		Natural cycle		161	55	21.2183	4950	36	0	0	14	3	0	1	1	2	2	1	1	0
2	104	41	age		E+P		163	96	36.1323	6034	25	0	0	9.9	2	2	1	1	1	1	0	1	0
2	105	32	Male		E+P		161	55	21.2183	3130	20	1	0	9.7	2	2	1	1	1	0	0	0	1
2	106	43	age		E+P		159	80	31.6443	3397	23	2	0	11.5	3	1	1	1	1	0	0	0	1
2	107	42	Endometriosis		E+P		150	65	28.8889	2086	14	2	0	10	2	2	1	1	1	0	0	0	1
2	108	30	Male		E+P		158	61	24.4352	2997	22	1	0	9.3	2	2	1	1	1	1	0	1	0
2	109	31	Tubal		E+P		165	83	30.4867	5526	22	0	0	13.7	1	1	1	1	1	0	0	0	1
2	110	31	Ovarian		E+P		162	58	22.1003	791	5	0	0	8.3	2	1	0	0	0	0	0	0	0
2	111	32	Male		E+P		161	47	18.132	1758	16	0	0	11.7	2	1	0	0	0	0	0	0	0
2	112	32	PCOS		E+P		168	62	21.9671	5551	37	1	0	10.8	3	1	1	1	2	2	1	1	0
2	113	32	PCOS		E+P		165	104	38.2002	2990	19	1	0	15.1	3	0	1	1	1	2	1	1	0
2	114	45	Ovarian		E+P		160	66	25.7812	2970	12	1	0	11	2	0	0	0	0	0	0	0	0
2	115	32	PCOS		E+P		168	67	23.7387	2554	24	1	0	9.8	2	1	1	1	1	1	0	1	0
2	116	35	Male		E+P		164	55	20.4491	6582	23	1	0	5.8	3	0	0	0	0	0	0	0	0
2	117	35	PCOS		E+P		161	53	20.4467	14902	53	0	0	10.3	2	2	0	0	0	0	0	0	0
2	118	35	unexplained		E+P		160	52	20.3125	5882	30	0	0	9.6	2	2	1	1	2	0	0	0	1
2	119	34	Male		E+P		169	58	20.3074	2645	14	0	0	8	2	1	0	0	0	0	0	0	0
2	120	41	Tubal		E+P		165	59	21.6713	5582	19	1	0	10.8	1	0	1	1	1	0	0	0	1
2	121	33	Male		Natural cycle		164	55	20.4491	9194	41	0	0	9.6	1	1	1	1	1	1	0	1	0
2	122	33	Male		E+P		155	50	20.8117	3609	16	0	0	12	1	0	1	1	1	1	0	1	0
2	123	33	PCOS		E+P		157	64	25.9645	3051	18	0	0	10.1	2	2	1	1	1	1	0	1	0
2	124	33	Unexplained		E+P		160	47	18.3594	6268	13	0	0	9.8	2	1	1	1	1	1	0	1	0
2	125	35	Tubal		E+P		160	48	18.75	6233	20	0	0	13.8	2	0	1	1	1	0	0	0	1
2	126	32	PCOS		E+P		165	105	38.5675	2990	19	1	0	15.1	3	0	1	1	1	1	0	1	0
2	127	41	age		natural		164	70	26.0262	1450	12	1	0	11.8	2	2	1	1	1	1	0	1	0
2	128	34	Unexplained		Natural cycle		160	47	18.3594	5109	32	2	0	10	2	1	1	1	1	1	0	1	0
2	129	34	Male		Natural cycle		162	49	18.6709	5574	28	0	0	9	2	0	1	1	1	2	1	1	0
2	130	34	Male		E+P		162	47	17.9089	26500	51	0	0	12.3	2	2	1	1	1	1	0	1	0
2	131	34	Unexplained		Natural cycle		163	50	18.8189	5801	35	2	1	14	2	2	0	0	0	0	0	0	0
2	132	37	Male		E+P		160	54	21.0938	5453	27	0	0	9.8	2	0	0	0	0	0	0	0	0
2	133	34	Tubal		E+P		168	49	17.3611	1935	15	1	0	10.3	2	2	0	0	0	0	0	0	0
2	134	34	PCOS		E+P		161	47	18.132	2752	29	0	0	8.5	2	1	1	1	1	1	0	1	0
2	135	34	PCOS		E+P		162	48	18.2899	7625	22	0	0	9	2	2	0	0	0	0	0	0	0
2	136	40	Male		E+P		157	51	20.6905	5579	23	2	1	13.9	2	1	1	1	1	1	0	1	0
2	137	35	PCOS		E+P		163	47	17.6898	6009	36	0	0	11.4	2	2	1	1	1	1	0	1	0
2	138	35	Male		Natural cycle		155	55	22.8928	8032	31	0	0	12	2	2	1	1	2	2	1	1	0
2	139	35	Male		E+P		162	58	22.1003	6114	45	0	0	9.2	2	1	1	1	1	1	0	1	0
2	140	35	Tubal		E+P		160	59	23.0469	1818	6	1	0	10.4	2	2	1	1	1	1	0	1	0
2	141	35	Ovarian		E+P		160	75	29.2969	2935	23	1	0	12	2	2	1	1	2	0	0	0	1
2	142	34	unexplained		E+P		175	63	20.5714	3709	20	1	0	9.7	1	0	0	0	0	0	0	0	0
2	143	35	Endometriosis		Natural cycle		155	45	18.7305	2077	6	0	0	10.1	3	0	0	0	0	0	0	0	0
2	144	44	Ovarian		Natural		158	64	25.6369	1754	14	0	0	15	3	1	1	1	1	0	0	0	1
2	145	35	male		E+P		160	46	17.9688	4381	21	0	0	10.6	2	1	1	0	0	0	0	0	0
2	146	35	PCOS		E+P		162	70	26.6728	5261	17	2	0	9.6	2	2	1	1	1	1	0	1	0
2	147	36	unexplained		natural		162	57	21.7193	2145	14	0	0	12.7	1	1	0	0	0	0	0	0	0
2	148	35	PCOS		Natural cycle		153	48	20.5049	5436	24	0	0	10.8	3	0	1	1	1	1	0	1	0
2	149	45	Male		E+P		162	57	21.7193	3321	15	0	0	9.8	2	1	0	0	0	0	0	0	0
2	150	35	unexplained		natural		160	57	22.2656	3793	23	1	0	14.8	2	1	1	1	1	1	0	1	0
2	151	37	Male		E+P		156	51	20.9566	1790	8	1	1	13.1	1	0	1	1	1	0	0	0	1
2	152	36	endometriosis		natural		164	45	16.7311	1650	7	0	0	11	1	1	0	0	0	0	0	0	0
2	153	36	Male		E+P		165	56	20.5693	3282	16	0	0	11	2	0	1	1	1	1	0	1	0
2	154	38	tubal		natural		164	60	22.3081	1664	12	0	0	8.1	1	0	1	1	1	1	0	1	0
2	155	36	Ovarian		E+P		163	67	25.2174	8293	51	0	0	12	2	2	1	1	1	1	0	1	0
2	156	44	Tubal		natural		158	55	22.0317	2105	11	2	0	9	1	0	0	0	0	0	0	0	0
2	157	36	Male		Natural cycle		153	47	20.0777	2314	19	0	0	8.9	4	0	0	0	0	0	0	0	0
2	158	36	Unexplained		E+P		164	52	19.3337	6184	23	2	0	8.8	2	2	1	1	1	1	0	1	0
2	159	36	Male		E+P		155	50	20.8117	3609	16	0	0	10	1	0	0	0	0	0	0	0	0
2	160	36	Unexplained		E+P		156	50	20.5457	3766	22	3	1	12.6	2	0	0	0	0	0	0	0	0
2	161	36	Ovarian		E+P		162	63	24.0055	1768	9	0	0	10.1	3	0	0	0	0	0	0	0	0
2	162	36	male		E+P		155	48	19.9792	3018	17	0	0	10.1	2	1	1	1	1	1	0	1	0
2	163	37	unexplained		Natural cycle		165	61	22.4059	1778	20	3	1	10	3	2	1	1	2	2	1	1	0
2	164	37	Ovarian		E+P		159	52	20.5688	5567	22	0	0	9.6	2	2	0	0	0	0	0	0	0
2	165	35	Male		natural		163	47	17.6898	1267	12	0	0	9	1	1	0	0	0	0	0	0	0
2	166	37	Unexplained		Natural cycle		154	52	21.9261	6223	22	0	0	12.1	2	2	1	1	2	1	0	1	0
2	167	38	age		E+P		156	76	31.2295	2230	11	0	0	10	2	1	0	0	0	0	0	0	0
2	168	32	Male		E+P		162	48	18.2899	1447	11	1	0	10	1	1	1	1	1	1	0	1	0
2	169	41	tubal		natural		162	49	18.6709	2847	17	0	0	15	1	0	0	0	0	0	0	0	0
2	170	38	Male		E+P		162	50	19.052	4072	24	0	0	9	2	1	1	1	1	1	0	1	0
2	171	29	unexplained		natural		150	47	20.8889	6700	24	0	0	11	2	1	1	1	1	1	0	1	0
2	172	41	unexplained		natural		155	54	22.4766	6055	25	2	1	8.6	1	1	1	1	1	1	0	1	0
2	173	38	Unexplained		Natural cycle		155	63	26.2227	1560	8	3	1	8.2	2	0	1	1	1	0	0	0	1
2	174	38	age		E+P		156	52	21.3675	6094	17	2	0	9	2	1	1	1	2	1	0	1	0
2	175	38	Tubal		E+P		160	66	25.7812	1409	17	1	0	11.6	2	1	1	1	1	1	0	1	0
2	176	39	Age		E+P		158	53	21.2306	3981	28	0	0	15.1	3	0	1	1	1	0	0	0	1
2	177	39	Ovarian		E+P		165	80	29.3848	5986	24	1	0	12.7	2	2	1	1	2	1	0	1	0
2	178	39	Age		E+P		153	53	22.6409	4354	19	2	1	9.1	3	2	0	0	0	0	0	0	0
2	179	39	Age		E+P		155	60	24.974	4099	12	0	0	9	2	1	0	0	0	0	0	0	0
2	180	39	Male		E+P		159	51	20.1733	9703	18	0	0	7.8	3	3	0	0	0	0	0	0	0
2	181	39	Male		E+P		158	53	21.2306	2600	10	0	0	9.7	2	0	0	0	0	0	0	0	0
2	182	39	Age		E+P		160	55	21.4844	2148	20	0	0	8.9	2	2	1	1	1	1	0	1	0
2	183	39	Age		Natural cycle		158	60	24.0346	3922	22	1	0	9.4	2	1	0	0	0	0	0	0	0
2	184	38	Male		natural		158	51	20.4294	3218	15	1	0	12	1	1	1	1	1	0	0	0	1
2	185	40	Male		E+P		158	57	22.8329	4584	23	0	0	11	2	0	1	1	1	1	0	1	0
2	186	33	unexplained		natural		167	60	21.5139	846	6	2	0	8.5	1	1	0	0	0	0	0	0	0
2	187	40	Male		E+P		160	62	24.2188	6199	17	0	0	14.7	2	1	1	1	1	1	0	1	0
2	188	36	Male		natural		163	50	18.8189	3482	13	0	0	12	1	1	1	1	1	1	0	1	0
2	189	37	Male		E+P		158	55	22.0317	4599	10	0	0	10	1	1	1	1	1	0	0	0	1
2	190	41	Male		Natural cycle		162	82	31.2452	1350	9	2	0	9.5	3	1	1	1	1	0	0	0	1
2	191	34	Male		E+P		59	162	22.48	5638	14	0	0	10	1	1	1	1	1	0	0	0	1
2	192	46	unexplained		E+P		159	62	24.5243	3180	22	0	0	11.9	1	0	0	0	0	0	0	0	0
2	193	30	Endometriosis		natural		170	56	19.3772	1169	21	0	0	11	4	1	0	0	0	0	0	0	0
2	194	33	Male		natural		167	57	20.4382	2528	16	0	0	12	3	0	0	0	0	0	0	0	0
2	195	42	Male		E+P		152	49	21.2084	4018	38	1	0	11.2	2	2	1	1	1	1	0	1	0
2	196	43	Ovarian		E+P		164	58	21.5645	3434	17	0	0	8.8	2	2	0	0	0	0	0	0	0
2	197	33	unexplained		E+P		153	48	20.5049	909	9	1	0	15	3	1	1	1	1	1	0	1	0
2	198	30	Tubal		natural		157	60	24.3418	708	13	3	1	11	2	0	0	0	0	0	0	0	0
2	199	44	Ovarian		E+P		162	55	20.9572	1568	8	3	1	10.6	4	2	1	1	1	0	0	0	1
2	200	44	Ovarian		E+P		157	59	23.9361	1600	12	1	0	12.6	3	0	0	0	0	0	0	0	0
2	201	40	Tubal		natural		159	53	20.9644	3797	15	0	0	10.3	2	0	0	0	0	0	0	0	0
2	202	34	Male		natural		158	51	20.4294	3278	21	1	0	11.9	2	0	0	0	0	0	0	0	0
2	203	29	Tubal		natural		158	46	18.4265	1019	11	0	0	12.2	3	1	0	0	0	0	0	0	0
2	204	34	Male		E+P		156	50	20.5457	3722	17	0	0	9	2	0	0	0	0	0	0	0	0
